# Supplementary figures and images for: Synthesis and near infrared luminescence of a tetrametallic Zn2Yb2 architecture from a trinuclear Zn3L2 Schiff base complex
Source: Royal Society of Chemistry journal article supplement (doi:10.1039/b416695g), 2005-01-01

**Supplementary Information:**

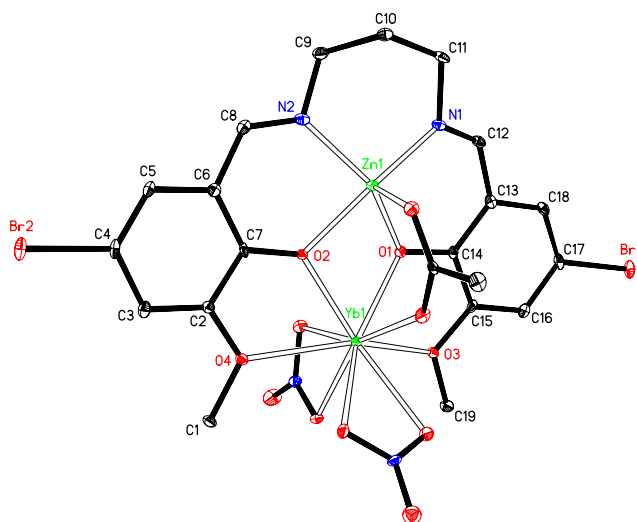

**Fig. S1** Crystal structure of **3**.

Supplement: b416695g.pdf [file b416695g.pdf]
